# Supplementary material
Source: publisher figshare collection journal article supplement (https://plos.figshare.com/articles/dataset/_/5013635)
Supplement: Supplementary file [file 1]

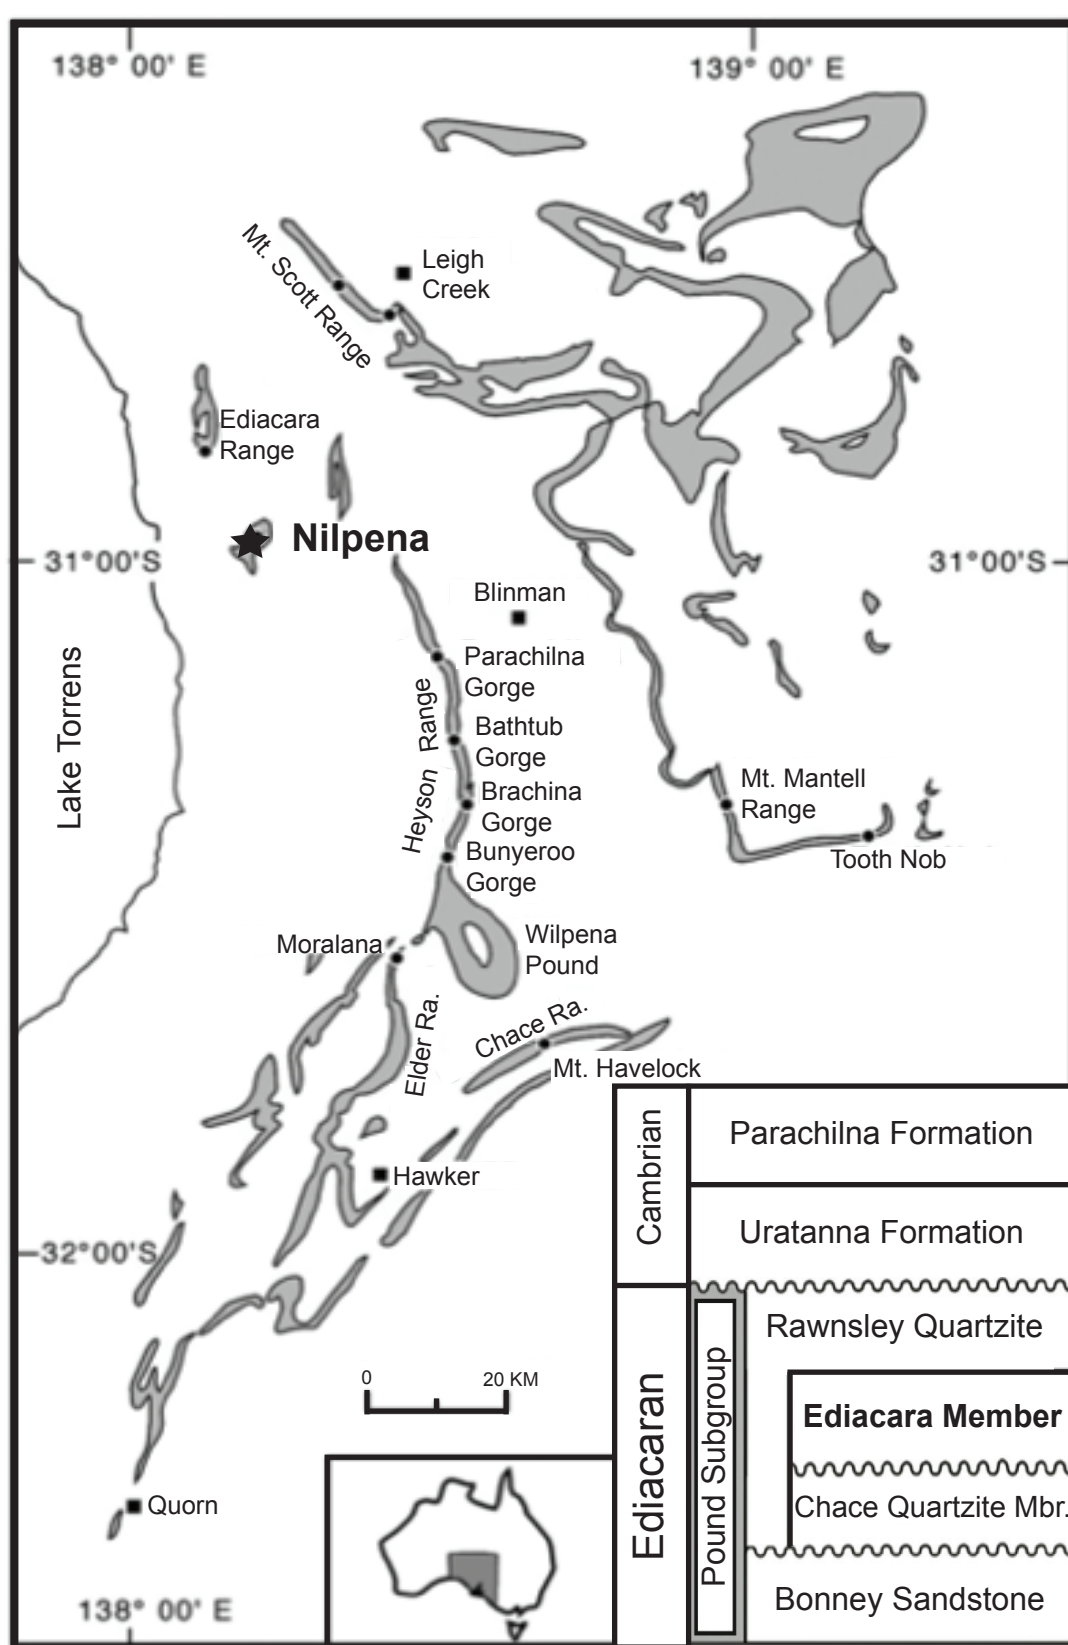

S1 Fig. Evans et al., 2017
